# Supplementary material
Source: publisher site journal article supplement (https://www.spandidos-publications.com/6092/downloadSupplementary)
Supplement: Supplementary file 1 [file downloadSupplementary]

## Sheet: Sheet1
Table SIX. List of patient samples from TCGA and GTEx databases.
Sample ID	Sample type
GTEX-145LU-1326-SM-5LU9N	Normal
GTEX-12ZZZ-1326-SM-59HKW	Normal
GTEX-RNOR-1426-SM-48FDJ	Normal
GTEX-11ZUS-2526-SM-59872	Normal
GTEX-WZTO-0626-SM-4PQYY	Normal
GTEX-RN64-1826-SM-48FDV	Normal
GTEX-Q2AG-1126-SM-48U1P	Normal
GTEX-11NUK-1226-SM-5P9GM	Normal
GTEX-13NYB-1026-SM-5IFH3	Normal
GTEX-11OF3-0726-SM-5BC4Z	Normal
GTEX-131XH-0626-SM-5LZWH	Normal
GTEX-11NV4-1326-SM-5HL6V	Normal
GTEX-13112-1426-SM-5EGH8	Normal
GTEX-XBEC-1526-SM-4AT68	Normal
GTEX-13VXU-0926-SM-5IFFH	Normal
GTEX-ZVT3-1626-SM-5GU66	Normal
GTEX-13NZB-0626-SM-5IFH6	Normal
GTEX-11DXY-0526-SM-5EGGQ	Normal
GTEX-SJXC-1226-SM-4DM78	Normal
GTEX-131YS-1626-SM-5HL6C	Normal
GTEX-T6MN-1226-SM-3NMA5	Normal
GTEX-12WSM-0726-SM-5GCOW	Normal
GTEX-QEG4-1826-SM-4R1JN	Normal
GTEX-11WQC-0726-SM-5EQMR	Normal
GTEX-12WSI-0226-SM-5GCNA	Normal
GTEX-13OW6-2626-SM-5IFF2	Normal
GTEX-YECK-1926-SM-4W21H	Normal
GTEX-13FTZ-0726-SM-5IFFY	Normal
GTEX-1212Z-0226-SM-59HLF	Normal
GTEX-139UC-1426-SM-5IJGH	Normal
GTEX-11ZTS-1426-SM-5EQMM	Normal
GTEX-ZVT4-0626-SM-5E45T	Normal
GTEX-11ZVC-0726-SM-5FQT9	Normal
GTEX-ZYT6-0626-SM-5E45V	Normal
GTEX-1399T-0826-SM-5IFES	Normal
GTEX-1269C-0626-SM-5FQSS	Normal
GTEX-RU72-1426-SM-46MUF	Normal
GTEX-13SLX-1226-SM-5S2Q6	Normal
GTEX-Y5V5-0926-SM-4VBPZ	Normal
GTEX-X261-1726-SM-4PQYT	Normal
GTEX-147JS-1126-SM-5RQIW	Normal
GTEX-147F4-1426-SM-5LUA8	Normal
GTEX-UTHO-2426-SM-4JBHD	Normal
GTEX-14A5I-1726-SM-5QGQ5	Normal
GTEX-XOTO-0826-SM-4B65O	Normal
GTEX-139TS-1426-SM-5IFJD	Normal
GTEX-13QJC-0726-SM-5RQJK	Normal
GTEX-12KS4-1326-SM-5LUB3	Normal
GTEX-13O3O-1826-SM-5IFGW	Normal
GTEX-S33H-1626-SM-4AD68	Normal
GTEX-139TU-0826-SM-5IJFG	Normal
GTEX-YFC4-1526-SM-5IFJS	Normal
GTEX-11DXZ-0126-SM-5EGGY	Normal
GTEX-12696-0826-SM-5EGGE	Normal
GTEX-WYVS-1926-SM-4SOIC	Normal
GTEX-1192X-1026-SM-5H12P	Normal
GTEX-13FLV-0326-SM-5N9DJ	Normal
GTEX-14E1K-0326-SM-5S2PE	Normal
GTEX-WYVS-1926-SM-4PQZ2	Normal
GTEX-ZF2S-3026-SM-4WWCH	Normal
GTEX-UPIC-0926-SM-4IHLV	Normal
GTEX-ZZPU-0426-SM-5GZYH	Normal
GTEX-11UD2-1626-SM-5EQM3	Normal
GTEX-14753-1626-SM-5NQ9L	Normal
GTEX-RTLS-1326-SM-46MUN	Normal
GTEX-ZAB5-0426-SM-5CVMI	Normal
GTEX-P44G-1126-SM-3NM9D	Normal
GTEX-12WSL-0226-SM-5CVMJ	Normal
GTEX-X4EP-1026-SM-4QAS5	Normal
GTEX-WQUQ-1926-SM-4OOSA	Normal
GTEX-X4XY-1626-SM-46MVN	Normal
GTEX-13PVR-0126-SM-5S2PY	Normal
GTEX-RWSA-1426-SM-47JXA	Normal
GTEX-ZVP2-0626-SM-51MSO	Normal
GTEX-WFON-1726-SM-4LVMQ	Normal
GTEX-ZEX8-0826-SM-4WKHK	Normal
GTEX-OOBJ-0826-SM-3NB2K	Normal
GTEX-P78B-1326-SM-3P611	Normal
GTEX-13PVQ-1526-SM-5IFEQ	Normal
GTEX-QDVN-0826-SM-48TZ2	Normal
GTEX-RM2N-1926-SM-48FCU	Normal
GTEX-11EQ9-0526-SM-5A5JZ	Normal
GTEX-Z9EW-0426-SM-5CVM9	Normal
GTEX-13NZ9-1326-SM-5MR3V	Normal
GTEX-1399R-1226-SM-5P9GF	Normal
GTEX-VUSG-0126-SM-4KL1X	Normal
GTEX-ZPU1-0826-SM-57WG2	Normal
GTEX-13OVJ-1026-SM-5IFGI	Normal
GTEX-WY7C-0726-SM-4ONCB	Normal
GTEX-14C38-1526-SM-5RQJ7	Normal
GTEX-ZF29-2026-SM-4WWB7	Normal
GTEX-ZAB4-0826-SM-5LU9D	Normal
GTEX-YB5E-0326-SM-5IFHU	Normal
GTEX-13FTW-1126-SM-5J2NV	Normal
GTEX-13N11-0926-SM-5IJG2	Normal
GTEX-139YR-0226-SM-5IFEM	Normal
GTEX-1497J-0726-SM-5Q5D1	Normal
GTEX-13113-1326-SM-5GCOI	Normal
GTEX-S32W-1926-SM-4AD63	Normal
GTEX-132AR-0426-SM-5IFH8	Normal
GTEX-11TT1-1726-SM-5EQLJ	Normal
GTEX-Y5LM-0426-SM-4VBRO	Normal
GTEX-131XE-0326-SM-5LZVO	Normal
GTEX-144GM-1326-SM-5LU5E	Normal
GTEX-O5YT-0826-SM-3TW8N	Normal
GTEX-U8XE-1526-SM-4E3HT	Normal
GTEX-ZYY3-0626-SM-5NQ6W	Normal
GTEX-11TUW-1726-SM-5BC5C	Normal
GTEX-ZTPG-1426-SM-51MT3	Normal
GTEX-XXEK-1126-SM-4BRUX	Normal
TCGA-DD-A1EC-11A	Normal
TCGA-DD-A1EL-11A	Normal
TCGA-DD-A3A5-11A	Normal
TCGA-DD-A3A3-11A	Normal
TCGA-DD-A3A1-11A	Normal
TCGA-DD-A1EB-11A	Normal
TCGA-DD-A1EI-11A	Normal
TCGA-DD-A3A6-11A	Normal
TCGA-DD-A1EH-11A	Normal
TCGA-DD-A11C-11A	Normal
TCGA-DD-A1EJ-11A	Normal
TCGA-DD-A3A4-11A	Normal
TCGA-BC-A10T-11A	Normal
TCGA-DD-A113-11A	Normal
TCGA-DD-A1EG-11A	Normal
TCGA-BC-A10Y-11A	Normal
TCGA-G3-A3CH-11A	Normal
TCGA-BC-A10X-11A	Normal
TCGA-FV-A23B-11A	Normal
TCGA-BC-A10W-11A	Normal
TCGA-DD-A114-11A	Normal
TCGA-DD-A39X-11A	Normal
TCGA-FV-A3I0-11A	Normal
TCGA-DD-A39Z-11A	Normal
TCGA-DD-A39W-11A	Normal
TCGA-DD-A3A8-11A	Normal
TCGA-DD-A116-11A	Normal
TCGA-DD-A39V-11A	Normal
TCGA-FV-A3I1-11A	Normal
TCGA-BC-A10Q-11A	Normal
TCGA-DD-A11D-11A	Normal
TCGA-FV-A2QR-11A	Normal
TCGA-DD-A11A-11A	Normal
TCGA-DD-A3A2-11A	Normal
TCGA-BD-A2L6-11A	Normal
TCGA-EP-A12J-11A	Normal
TCGA-BC-A110-11A	Normal
TCGA-EP-A26S-11A	Normal
TCGA-BC-A10R-11A	Normal
TCGA-DD-A118-11A	Normal
TCGA-DD-A119-11A	Normal
TCGA-DD-A1EE-11A	Normal
TCGA-BC-A216-11A	Normal
TCGA-BC-A10Z-11A	Normal
TCGA-FV-A3R2-11A	Normal
TCGA-ES-A2HT-11A	Normal
TCGA-BD-A3EP-11A	Normal
TCGA-EP-A3RK-11A	Normal
TCGA-BC-A10U-11A	Normal
TCGA-DD-A11B-11A	Normal
TCGA-DD-A4NG-01A	Tumor
TCGA-G3-AAV4-01A	Tumor
TCGA-2Y-A9H1-01A	Tumor
TCGA-CC-A3M9-01A	Tumor
TCGA-K7-AAU7-01A	Tumor
TCGA-BC-A10W-01A	Tumor
TCGA-DD-AACV-01A	Tumor
TCGA-DD-AAD3-01A	Tumor
TCGA-DD-AACA-01A	Tumor
TCGA-G3-AAV2-01A	Tumor
TCGA-DD-AACT-01A	Tumor
TCGA-GJ-A6C0-01A	Tumor
TCGA-CC-5258-01A	Tumor
TCGA-QA-A7B7-01A	Tumor
TCGA-2Y-A9H3-01A	Tumor
TCGA-DD-AACW-01A	Tumor
TCGA-ZS-A9CD-01A	Tumor
TCGA-UB-A7MF-01A	Tumor
TCGA-G3-A5SI-01A	Tumor
TCGA-CC-A8HV-01A	Tumor
TCGA-DD-AADQ-01A	Tumor
TCGA-2Y-A9H6-01A	Tumor
TCGA-DD-A1EA-01A	Tumor
TCGA-5R-AA1C-01A	Tumor
TCGA-DD-A113-01A	Tumor
TCGA-2Y-A9H9-01A	Tumor
TCGA-CC-A7IE-01A	Tumor
TCGA-XR-A8TD-01A	Tumor
TCGA-DD-AAD2-01A	Tumor
TCGA-DD-AACY-01A	Tumor
TCGA-ED-A4XI-01A	Tumor
TCGA-CC-A9FW-01A	Tumor
TCGA-DD-A4NP-01A	Tumor
TCGA-G3-A5SJ-01A	Tumor
TCGA-DD-AAE2-01A	Tumor
TCGA-DD-AAEK-01A	Tumor
TCGA-EP-A2KC-01A	Tumor
TCGA-2Y-A9GS-01A	Tumor
TCGA-DD-A4NE-01A	Tumor
TCGA-DD-AADC-01A	Tumor
TCGA-DD-AAVZ-01A	Tumor
TCGA-CC-A3MA-01A	Tumor
TCGA-2Y-A9GY-01A	Tumor
TCGA-ED-A627-01A	Tumor
TCGA-2Y-A9GW-01A	Tumor
TCGA-DD-AADO-01A	Tumor
TCGA-DD-AADP-01A	Tumor
TCGA-DD-AADK-01A	Tumor
TCGA-G3-AAV7-01A	Tumor
TCGA-DD-A1EI-01A	Tumor
TCGA-KR-A7K0-01A	Tumor
TCGA-DD-AACC-01A	Tumor
TCGA-BC-A3KG-01A	Tumor
TCGA-G3-AAV1-01A	Tumor
TCGA-CC-A7IK-01A	Tumor
TCGA-G3-A25S-01A	Tumor
TCGA-DD-AADR-01A	Tumor
TCGA-UB-A7MD-01A	Tumor
TCGA-DD-A4NS-01A	Tumor
TCGA-DD-AAE3-01A	Tumor
TCGA-DD-AACP-01A	Tumor
TCGA-DD-A115-01A	Tumor
TCGA-2Y-A9H8-01A	Tumor
TCGA-FV-A3I1-01A	Tumor
TCGA-2Y-A9H7-01A	Tumor
TCGA-DD-AAVU-01A	Tumor
TCGA-BC-A110-01A	Tumor
TCGA-ZP-A9CZ-01A	Tumor
TCGA-DD-AAE1-01A	Tumor
TCGA-GJ-A3OU-01A	Tumor
TCGA-DD-A4NK-01A	Tumor
TCGA-RC-A7SB-01A	Tumor
TCGA-FV-A3I0-01A	Tumor
TCGA-ED-A66X-01A	Tumor
TCGA-2Y-A9GT-01A	Tumor
TCGA-FV-A2QQ-01A	Tumor
TCGA-DD-AAEH-01A	Tumor
TCGA-G3-A3CK-01A	Tumor
TCGA-EP-A26S-01A	Tumor
TCGA-DD-A11A-01A	Tumor
TCGA-DD-AAE6-01A	Tumor
TCGA-XR-A8TE-01A	Tumor
TCGA-DD-A73B-01A	Tumor
TCGA-EP-A3JL-01A	Tumor
TCGA-CC-A3MB-01A	Tumor
TCGA-DD-AAD0-01A	Tumor
TCGA-MI-A75I-01A	Tumor
TCGA-CC-A8HU-01A	Tumor
TCGA-RC-A6M5-01A	Tumor
TCGA-2Y-A9GZ-01A	Tumor
TCGA-DD-AACO-01A	Tumor
TCGA-LG-A6GG-01A	Tumor
TCGA-ED-A7PZ-01A	Tumor
TCGA-DD-A4NV-01A	Tumor
TCGA-DD-A73G-01A	Tumor
TCGA-G3-AAV3-01A	Tumor
TCGA-BC-A5W4-01A	Tumor
TCGA-UB-AA0U-01A	Tumor
TCGA-EP-A12J-01A	Tumor
TCGA-WJ-A86L-01A	Tumor
TCGA-FV-A4ZQ-01A	Tumor
TCGA-WX-AA46-01A	Tumor
TCGA-DD-A4ND-01A	Tumor
TCGA-ED-A8O5-01A	Tumor
TCGA-UB-A7ME-01A	Tumor
TCGA-CC-5264-01A	Tumor
TCGA-G3-A7M7-01A	Tumor
TCGA-DD-AACS-01A	Tumor
TCGA-DD-AAE0-01A	Tumor
TCGA-G3-A5SK-01A	Tumor
TCGA-BC-A69I-01A	Tumor
TCGA-BC-A10R-01A	Tumor
TCGA-5C-AAPD-01A	Tumor
TCGA-BC-A10S-01A	Tumor
TCGA-DD-AAVX-01A	Tumor
TCGA-DD-AAVQ-01A	Tumor
TCGA-G3-A3CJ-01A	Tumor
TCGA-DD-A4NF-01A	Tumor
TCGA-BC-A10Q-01A	Tumor
TCGA-DD-A1EE-01A	Tumor
TCGA-ZP-A9CY-01A	Tumor
TCGA-FV-A23B-01A	Tumor
TCGA-HP-A5MZ-01A	Tumor
TCGA-DD-AADB-01A	Tumor
TCGA-CC-A1HT-01A	Tumor
TCGA-DD-A11B-01A	Tumor
TCGA-ED-A7XP-01A	Tumor
TCGA-FV-A3R3-01A	Tumor
TCGA-HP-A5N0-01A	Tumor
TCGA-DD-A4NI-01A	Tumor
TCGA-EP-A2KB-01A	Tumor
TCGA-CC-A7IH-01A	Tumor
TCGA-ES-A2HS-01A	Tumor
TCGA-G3-A3CG-01A	Tumor
TCGA-ED-A5KG-01A	Tumor
TCGA-CC-A123-01A	Tumor
TCGA-DD-AAD1-01A	Tumor
TCGA-DD-A73D-01A	Tumor
TCGA-DD-AAVW-01A	Tumor
TCGA-DD-AAVS-01A	Tumor
TCGA-DD-AACN-01A	Tumor
TCGA-DD-A3A2-01A	Tumor
TCGA-K7-A5RF-01A	Tumor
TCGA-DD-A116-01A	Tumor
TCGA-K7-A5RG-01A	Tumor
TCGA-BC-A10T-01A	Tumor
TCGA-DD-AADJ-01A	Tumor
TCGA-DD-AACE-01A	Tumor
TCGA-FV-A3R2-01A	Tumor
TCGA-DD-AADD-01A	Tumor
TCGA-DD-AACX-01A	Tumor
TCGA-4R-AA8I-01A	Tumor
TCGA-FV-A496-01A	Tumor
TCGA-CC-A7IF-01A	Tumor
TCGA-DD-AADS-01A	Tumor
TCGA-DD-AAE9-01A	Tumor
TCGA-NI-A4U2-01A	Tumor
TCGA-DD-AACI-01A	Tumor
TCGA-ZP-A9D1-01A	Tumor
TCGA-UB-A7MB-01A	Tumor
TCGA-2Y-A9HA-01A	Tumor
TCGA-DD-A4NR-01A	Tumor
TCGA-RG-A7D4-01A	Tumor
TCGA-5R-AAAM-01A	Tumor
TCGA-ED-A97K-01A	Tumor
TCGA-DD-A3A4-01A	Tumor
TCGA-BC-A217-01A	Tumor
TCGA-DD-A4NQ-01A	Tumor
TCGA-G3-A25T-01A	Tumor
TCGA-UB-A7MC-01A	Tumor
TCGA-MR-A8JO-01A	Tumor
TCGA-DD-AADI-01A	Tumor
TCGA-WX-AA47-01A	Tumor
TCGA-DD-AADA-01A	Tumor
TCGA-WQ-AB4B-01A	Tumor
TCGA-YA-A8S7-01A	Tumor
TCGA-2Y-A9H2-01A	Tumor
TCGA-5C-A9VG-01A	Tumor
TCGA-BC-A10Y-01A	Tumor
TCGA-EP-A2KA-01A	Tumor
TCGA-BC-A10X-01A	Tumor
TCGA-DD-AADW-01A	Tumor
TCGA-DD-AAED-01A	Tumor
TCGA-LG-A9QD-01A	Tumor
TCGA-DD-AADV-01A	Tumor
TCGA-G3-A3CH-01A	Tumor
TCGA-DD-AAW0-01A	Tumor
TCGA-DD-AAW3-01A	Tumor
TCGA-ED-A7PY-01A	Tumor
TCGA-ZP-A9D2-01A	Tumor
TCGA-G3-A25Y-01A	Tumor
TCGA-G3-A3CI-01A	Tumor
TCGA-ZP-A9D0-01A	Tumor
TCGA-EP-A3RK-01A	Tumor
TCGA-CC-A7IJ-01A	Tumor
TCGA-MI-A75H-01A	Tumor
TCGA-G3-AAV5-01A	Tumor
TCGA-ZP-A9D4-01A	Tumor
TCGA-DD-A1ED-01A	Tumor
TCGA-DD-A39X-01A	Tumor
TCGA-ED-A459-01A	Tumor
TCGA-2Y-A9GX-01A	Tumor
TCGA-DD-A73E-01A	Tumor
TCGA-DD-AACL-01A	Tumor
TCGA-MR-A520-01A	Tumor
TCGA-DD-A1EF-01A	Tumor
TCGA-FV-A4ZP-01A	Tumor
TCGA-WX-AA44-01A	Tumor
TCGA-ED-A7PX-01A	Tumor
TCGA-CC-A7IG-01A	Tumor
TCGA-G3-A25X-01A	Tumor
TCGA-G3-A25U-01A	Tumor
TCGA-BC-4072-01B	Tumor
TCGA-XR-A8TC-01A	Tumor
TCGA-BC-A3KF-01A	Tumor
TCGA-O8-A75V-01A	Tumor
TCGA-BC-A8YO-01A	Tumor
TCGA-DD-A39V-01A	Tumor
TCGA-DD-A1EC-01A	Tumor
TCGA-DD-AACQ-01A	Tumor
TCGA-DD-A1EH-01A	Tumor
TCGA-KR-A7K7-01A	Tumor
TCGA-DD-AAVV-01A	Tumor
TCGA-DD-AADN-01A	Tumor
TCGA-LG-A9QC-01A	Tumor
TCGA-RC-A7S9-01A	Tumor
TCGA-BC-A112-01A	Tumor
TCGA-2Y-A9H0-01A	Tumor
TCGA-DD-AAW2-01A	Tumor
TCGA-KR-A7K2-01A	Tumor
TCGA-DD-AADU-01A	Tumor
TCGA-ED-A66Y-01A	Tumor
TCGA-CC-A8HT-01A	Tumor
TCGA-DD-AADY-01A	Tumor
TCGA-BC-A216-01A	Tumor
TCGA-G3-AAUZ-01A	Tumor
TCGA-RC-A7SK-01A	Tumor
TCGA-G3-A25Z-01A	Tumor
TCGA-DD-AAD8-01A	Tumor
TCGA-DD-AAEE-01A	Tumor
TCGA-2Y-A9GU-01A	Tumor
TCGA-DD-A119-01A	Tumor
TCGA-G3-AAV6-01A	Tumor
TCGA-DD-A73F-01A	Tumor
TCGA-CC-A5UD-01A	Tumor
TCGA-DD-AACD-01A	Tumor
TCGA-CC-A8HS-01A	Tumor
TCGA-DD-A11D-01A	Tumor
TCGA-DD-A1EG-01A	Tumor
TCGA-PD-A5DF-01A	Tumor
TCGA-DD-A3A9-01A	Tumor
TCGA-2Y-A9H4-01A	Tumor
TCGA-DD-AACK-01A	Tumor
TCGA-DD-A118-01A	Tumor
TCGA-DD-A4NL-01A	Tumor
TCGA-5C-A9VH-01A	Tumor
TCGA-3K-AAZ8-01A	Tumor
TCGA-MI-A75G-01A	Tumor
TCGA-DD-A3A6-01A	Tumor
TCGA-DD-AADM-01A	Tumor
TCGA-DD-AAC8-01A	Tumor
TCGA-DD-A4NN-01A	Tumor
TCGA-DD-A4NH-01A	Tumor
TCGA-K7-A6G5-01A	Tumor
TCGA-DD-AACU-01A	Tumor
TCGA-CC-A7IL-01A	Tumor
TCGA-BW-A5NO-01A	Tumor
TCGA-XR-A8TG-01A	Tumor
TCGA-DD-A1EJ-01A	Tumor
TCGA-G3-A7M8-01A	Tumor
TCGA-UB-AA0V-01A	Tumor
TCGA-DD-AACZ-01A	Tumor
TCGA-DD-A1EB-01A	Tumor
TCGA-BC-4073-01B	Tumor
TCGA-ZS-A9CG-01A	Tumor
TCGA-BD-A2L6-01A	Tumor
TCGA-CC-5260-01A	Tumor
TCGA-DD-AAD5-01A	Tumor
TCGA-BD-A3EP-01A	Tumor
TCGA-WQ-A9G7-01A	Tumor
TCGA-FV-A2QR-01A	Tumor
TCGA-DD-AAC9-01A	Tumor
TCGA-DD-AA3A-01A	Tumor
TCGA-CC-5263-01A	Tumor
TCGA-FV-A495-01A	Tumor
TCGA-BC-A10Z-01A	Tumor
TCGA-DD-AAVR-01A	Tumor
TCGA-ZS-A9CE-01A	Tumor
TCGA-CC-5259-01A	Tumor
TCGA-5R-AA1D-01A	Tumor
TCGA-ED-A82E-01A	Tumor
TCGA-DD-A3A1-01A	Tumor
TCGA-DD-AAEA-01A	Tumor
TCGA-ZS-A9CF-01A	Tumor
TCGA-G3-A25V-01A	Tumor
TCGA-CC-A9FS-01A	Tumor
TCGA-BC-A69H-01A	Tumor
TCGA-DD-A3A7-01A	Tumor
TCGA-G3-A7M6-01A	Tumor
TCGA-MI-A75E-01A	Tumor
TCGA-DD-AAE4-01A	Tumor
TCGA-CC-A7II-01A	Tumor
TCGA-G3-A7M5-01A	Tumor
TCGA-CC-A3MC-01A	Tumor
TCGA-ES-A2HT-01A	Tumor
TCGA-G3-A6UC-01A	Tumor
TCGA-BD-A3ER-01A	Tumor
TCGA-DD-A3A5-01A	Tumor
TCGA-DD-AACH-01A	Tumor
TCGA-CC-5262-01A	Tumor
TCGA-DD-AADG-01A	Tumor
TCGA-DD-A39Z-01A	Tumor
TCGA-DD-AACJ-01A	Tumor
TCGA-DD-AADL-01A	Tumor
TCGA-DD-AAEG-01A	Tumor
TCGA-DD-A4NO-01A	Tumor
TCGA-CC-A5UE-01A	Tumor
TCGA-G3-A7M9-01A	Tumor
TCGA-2Y-A9HB-01A	Tumor
TCGA-DD-A39W-01A	Tumor
TCGA-2Y-A9GV-01A	Tumor
TCGA-DD-AACF-01A	Tumor
TCGA-UB-A7MA-01A	Tumor
TCGA-DD-AAE7-01A	Tumor
TCGA-MI-A75C-01A	Tumor
TCGA-DD-A4NA-01A	Tumor
TCGA-ZP-A9CV-01A	Tumor
TCGA-RC-A6M6-01A	Tumor
TCGA-T1-A6J8-01A	Tumor
TCGA-DD-A1EK-01A	Tumor
TCGA-KR-A7K8-01A	Tumor
TCGA-DD-AAD6-01A	Tumor
TCGA-DD-A4NB-01A	Tumor
TCGA-DD-A11C-01A	Tumor
TCGA-RC-A7SF-01A	Tumor
TCGA-ED-A8O6-01A	Tumor
TCGA-DD-AAEB-01A	Tumor
TCGA-DD-AAVP-01A	Tumor
TCGA-DD-A73A-01A	Tumor
TCGA-RC-A6M4-01A	Tumor
TCGA-G3-AAV0-01A	Tumor
TCGA-DD-AAVY-01A	Tumor
TCGA-DD-A1EL-01A	Tumor
TCGA-DD-A4NJ-01A	Tumor
TCGA-G3-A5SM-01A	Tumor
TCGA-G3-A5SL-01A	Tumor
TCGA-BC-A10U-01A	Tumor
TCGA-DD-AACG-01A	Tumor
TCGA-DD-A3A3-01A	Tumor
TCGA-ED-A7XO-01A	Tumor
TCGA-DD-AACB-01A	Tumor
TCGA-RC-A7SH-01A	Tumor
TCGA-CC-5261-01A	Tumor
TCGA-DD-A3A8-01A	Tumor
TCGA-DD-A73C-01A	Tumor
TCGA-GJ-A9DB-01A	Tumor
TCGA-DD-AAW1-01A	Tumor
TCGA-XR-A8TF-01A	Tumor
TCGA-CC-A5UC-01A	Tumor
TCGA-DD-A39Y-01A	Tumor
TCGA-DD-A114-01A	Tumor
TCGA-NI-A8LF-01A	Tumor
TCGA-DD-AADF-01A	Tumor
TCGA-DD-AAEI-01A	Tumor
TCGA-2Y-A9H5-01A	Tumor
GTEx, Genotype-Tissue Expression; TCGA, The Cancer Genome Atlas.
Table SX. Treatment information for patient samples from TCGA database.
Sample ID	Overall survival	Patient ID	Overall survival time, days	Therapy type	Drug name	History of neoadjuvant treatment	History of other prior surgery type	Postoperative ablation embolization tx	Postoperative rx tx	Radiation therapy
TCGA-2Y-A9GS-01A	1	TCGA-2Y-A9GS	724	NA	NA	No	NA	NA	NA	NA
TCGA-2Y-A9GT-01A	1	TCGA-2Y-A9GT	1624	NA	NA	No	NA	NA	NA	NA
TCGA-2Y-A9GU-01A	0	TCGA-2Y-A9GU	1939	NA	NA	No	NA	No	No	No
TCGA-2Y-A9GV-01A	1	TCGA-2Y-A9GV	2532	Chemotherapy	Naxavar	No	NA	NA	NA	NA
TCGA-2Y-A9GW-01A	1	TCGA-2Y-A9GW	1271	NA	NA	No	NA	NA	NA	NA
TCGA-2Y-A9GX-01A	0	TCGA-2Y-A9GX	2442	NA	NA	No	NA	No	No	No
TCGA-2Y-A9GY-01A	1	TCGA-2Y-A9GY	757	NA	NA	No	NA	NA	NA	NA
TCGA-2Y-A9GZ-01A	1	TCGA-2Y-A9GZ	848	Chemotherapy	Naxavar	No	NA	NA	NA	NA
TCGA-2Y-A9H0-01A	0	TCGA-2Y-A9H0	3675	NA	NA	No	NA	No	No	No
TCGA-2Y-A9H1-01A	1	TCGA-2Y-A9H1	1229	NA	NA	No	NA	NA	NA	NA
TCGA-2Y-A9H2-01A	0	TCGA-2Y-A9H2	1731	NA	NA	No	NA	No	No	No
TCGA-2Y-A9H3-01A	0	TCGA-2Y-A9H3	1516	NA	NA	No	NA	NA	No	No
TCGA-2Y-A9H4-01A	0	TCGA-2Y-A9H4	1452	NA	NA	No	NA	No	No	No
TCGA-2Y-A9H5-01A	1	TCGA-2Y-A9H5	555	NA	NA	No	NA	NA	NA	NA
TCGA-2Y-A9H6-01A	0	TCGA-2Y-A9H6	357	NA	NA	No	NA	NA	NA	NA
TCGA-2Y-A9H7-01A	0	TCGA-2Y-A9H7	1168	NA	NA	No	NA	NA	No	No
TCGA-2Y-A9H8-01A	1	TCGA-2Y-A9H8	633	Chemotherapy	Naxavar	No	NA	NA	NA	NA
TCGA-2Y-A9H9-01A	0	TCGA-2Y-A9H9	697	Chemotherapy	Naxavar	No	NA	NA	NA	NA
TCGA-2Y-A9HA-01A	1	TCGA-2Y-A9HA	36	NA	NA	No	NA	NA	NA	NA
TCGA-2Y-A9HB-01A	0	TCGA-2Y-A9HB	260	NA	NA	No	NA	NA	NA	NA
TCGA-3K-AAZ8-01A	0	TCGA-3K-AAZ8	396	NA	Sarafenib	No	NA	No	Yes	No
TCGA-4R-AA8I-01A	1	TCGA-4R-AA8I	262	NA	NA	No	NA	No	No	No
TCGA-5C-A9VG-01A	0	TCGA-5C-A9VG	328	NA	NA	No	NA	No	No	No
TCGA-5C-A9VH-01A	0	TCGA-5C-A9VH	322	NA	NA	No	NA	No	No	No
TCGA-5C-AAPD-01A	0	TCGA-5C-AAPD	20	NA	NA	No	NA	No	No	No
TCGA-5R-AA1C-01A	0	TCGA-5R-AA1C	520	NA	NA	No	NA	No	No	No
TCGA-5R-AA1D-01A	0	TCGA-5R-AA1D	449	NA	NA	No	NA	No	No	Yes
TCGA-5R-AAAM-01A	1	TCGA-5R-AAAM	46	NA	NA	No	NA	NA	NA	NA
TCGA-BC-4072-01B	1	TCGA-BC-4072	1490	NA	NA	No	NA	No	No	No
TCGA-BC-4073-01B	0	TCGA-BC-4073	849	Chemotherapy	Sorafenib	No	NA	No	No	No
TCGA-BC-A10Q-01A	1	TCGA-BC-A10Q	1135	Other, specify in noteschemoembolization	Adriamycin	No	NA	Yes	Yes	No
TCGA-BC-A10R-01A	1	TCGA-BC-A10R	308	Other, specify in noteschemoembolization	NA	No	NA	No	No	No
TCGA-BC-A10S-01A	1	TCGA-BC-A10S	1423	NA	NA	No	NA	No	No	No
TCGA-BC-A10T-01A	1	TCGA-BC-A10T	837	NA	NA	No	R hepatic lobectomy w/ resection of L segment	No	No	No
TCGA-BC-A10U-01A	1	TCGA-BC-A10U	837	NA	NA	No	NA	No	No	No
TCGA-BC-A10W-01A	1	TCGA-BC-A10W	91	Chemotherapy	NA	No	NA	No	Yes	No
TCGA-BC-A10X-01A	1	TCGA-BC-A10X	770	NA	NA	No	NA	No	No	No
TCGA-BC-A10Y-01A	1	TCGA-BC-A10Y	711	NA	NA	No	NA	Yes	No	No
TCGA-BC-A10Z-01A	1	TCGA-BC-A10Z	34	NA	NA	No	NA	No	No	No
TCGA-BC-A110-01A	1	TCGA-BC-A110	2116	NA	NA	No	NA	No	Yes	No
TCGA-BC-A112-01A	1	TCGA-BC-A112	153	NA	NA	No	NA	No	No	No
TCGA-BC-A216-01A	0	TCGA-BC-A216	1351	NA	NA	No	NA	No	No	No
TCGA-BC-A217-01A	1	TCGA-BC-A217	1397	NA	NA	No	NA	No	No	No
TCGA-BC-A3KF-01A	0	TCGA-BC-A3KF	8	NA	NA	No	NA	NA	NA	NA
TCGA-BC-A3KG-01A	0	TCGA-BC-A3KG	680	NA	NA	No	NA	No	No	No
TCGA-BC-A5W4-01A	1	TCGA-BC-A5W4	547	NA	NA	No	NA	No	No	No
TCGA-BC-A69H-01A	0	TCGA-BC-A69H	444	NA	NA	No	NA	No	No	No
TCGA-BC-A69I-01A	0	TCGA-BC-A69I	387	NA	NA	No	NA	No	No	No
TCGA-BC-A8YO-01A	0	TCGA-BC-A8YO	562	Chemotherapy	Nexavar	No	NA	No	Yes	No
TCGA-BD-A2L6-01A	0	TCGA-BD-A2L6	1363	NA	NA	No	NA	No	No	No
TCGA-BD-A3EP-01A	0	TCGA-BD-A3EP	409	NA	NA	No	NA	No	No	No
TCGA-BD-A3ER-01A	0	TCGA-BD-A3ER	1115	NA	NA	No	NA	No	No	No
TCGA-BW-A5NO-01A	0	TCGA-BW-A5NO	20	NA	NA	No	NA	NA	NA	NA
TCGA-CC-5258-01A	1	TCGA-CC-5258	129	NA	NA	No	Hepatic resection (right)	No	No	No
TCGA-CC-5259-01A	0	TCGA-CC-5259	250	NA	NA	No	NA	No	No	No
TCGA-CC-5260-01A	1	TCGA-CC-5260	87	NA	NA	No	Hepatic resection	No	No	No
TCGA-CC-5261-01A	1	TCGA-CC-5261	97	NA	NA	No	Hepatic resection	No	No	No
TCGA-CC-5262-01A	1	TCGA-CC-5262	103	NA	NA	No	Hepatic resection	No	No	No
TCGA-CC-5263-01A	1	TCGA-CC-5263	129	NA	NA	No	Hepatic resection	No	No	No
TCGA-CC-5264-01A	1	TCGA-CC-5264	102	NA	NA	No	Hepatic resection	No	No	No
TCGA-CC-A123-01A	0	TCGA-CC-A123	219	NA	NA	No	Hepatic resection	No	No	No
TCGA-CC-A1HT-01A	1	TCGA-CC-A1HT	101	NA	NA	No	Hepatic resection	No	No	No
TCGA-CC-A3M9-01A	1	TCGA-CC-A3M9	300	NA	NA	No	NA	No	No	No
TCGA-CC-A3MA-01A	1	TCGA-CC-A3MA	303	NA	NA	No	NA	No	No	No
TCGA-CC-A3MB-01A	1	TCGA-CC-A3MB	315	NA	NA	No	NA	No	No	No
TCGA-CC-A3MC-01A	0	TCGA-CC-A3MC	363	NA	NA	No	NA	No	No	No
TCGA-CC-A5UC-01A	1	TCGA-CC-A5UC	347	NA	NA	No	NA	No	No	No
TCGA-CC-A5UD-01A	1	TCGA-CC-A5UD	304	NA	NA	No	NA	No	No	No
TCGA-CC-A5UE-01A	1	TCGA-CC-A5UE	272	NA	NA	No	NA	No	No	No
TCGA-CC-A7IE-01A	1	TCGA-CC-A7IE	217	NA	NA	No	NA	No	No	No
TCGA-CC-A7IF-01A	1	TCGA-CC-A7IF	649	NA	NA	No	NA	No	No	No
TCGA-CC-A7IG-01A	1	TCGA-CC-A7IG	299	NA	NA	No	NA	No	No	No
TCGA-CC-A7IH-01A	0	TCGA-CC-A7IH	365	NA	NA	No	NA	No	No	No
TCGA-CC-A7II-01A	0	TCGA-CC-A7II	399	NA	NA	No	NA	No	No	No
TCGA-CC-A7IJ-01A	0	TCGA-CC-A7IJ	382	NA	NA	No	NA	No	No	No
TCGA-CC-A7IK-01A	1	TCGA-CC-A7IK	262	NA	NA	No	NA	No	No	No
TCGA-CC-A7IL-01A	1	TCGA-CC-A7IL	278	NA	NA	No	NA	No	No	No
TCGA-CC-A8HS-01A	1	TCGA-CC-A8HS	300	NA	NA	No	NA	No	No	No
TCGA-CC-A8HT-01A	1	TCGA-CC-A8HT	140	NA	NA	No	NA	No	No	No
TCGA-CC-A8HU-01A	1	TCGA-CC-A8HU	344	NA	NA	No	NA	No	No	No
TCGA-CC-A8HV-01A	1	TCGA-CC-A8HV	279	Targeted molecular therapy	Nexavar	No	NA	No	No	No
TCGA-CC-A9FS-01A	0	TCGA-CC-A9FS	211	NA	NA	No	NA	No	No	No
TCGA-CC-A9FW-01A	0	TCGA-CC-A9FW	248	NA	NA	No	NA	No	No	No
TCGA-DD-A113-01A	0	TCGA-DD-A113	2425	NA	NA	No	NA	No	No	No
TCGA-DD-A114-01A	1	TCGA-DD-A114	1149	NA	NA	No	NA	No	No	No
TCGA-DD-A115-01A	1	TCGA-DD-A115	2542	Chemotherapy	NA	No	NA	No	No	No
TCGA-DD-A116-01A	1	TCGA-DD-A116	1622	NA	NA	No	NA	No	No	Yes
TCGA-DD-A118-01A	0	TCGA-DD-A118	3437	NA	NA	No	NA	No	No	No
TCGA-DD-A119-01A	1	TCGA-DD-A119	223	NA	NA	No	NA	NA	NA	NA
TCGA-DD-A11A-01A	1	TCGA-DD-A11A	79	NA	NA	No	NA	NA	NA	NA
TCGA-DD-A11B-01A	1	TCGA-DD-A11B	14	NA	NA	No	NA	No	No	No
TCGA-DD-A11C-01A	0	TCGA-DD-A11C	662	NA	NA	No	NA	No	No	No
TCGA-DD-A11D-01A	1	TCGA-DD-A11D	1560	Chemotherapy	Sorafenib	No	NA	No	No	No
TCGA-DD-A1EA-01A	0	TCGA-DD-A1EA	2415	NA	NA	No	NA	No	No	No
TCGA-DD-A1EB-01A	0	TCGA-DD-A1EB	2017	NA	NA	No	NA	No	No	No
TCGA-DD-A1EC-01A	0	TCGA-DD-A1EC	602	Chemotherapy	NA	No	NA	No	No	No
TCGA-DD-A1ED-01A	0	TCGA-DD-A1ED	2301	NA	NA	No	NA	No	No	No
TCGA-DD-A1EE-01A	1	TCGA-DD-A1EE	349	NA	NA	No	NA	No	No	No
TCGA-DD-A1EF-01A	1	TCGA-DD-A1EF	394	NA	NA	No	NA	NA	NA	NA
TCGA-DD-A1EG-01A	1	TCGA-DD-A1EG	1372	Chemotherapy	Sorafenib	No	NA	Yes	Yes	No
TCGA-DD-A1EH-01A	0	TCGA-DD-A1EH	1495	Chemotherapy	Sorafenib	No	NA	Yes	Yes	No
TCGA-DD-A1EI-01A	0	TCGA-DD-A1EI	183	NA	NA	No	NA	NA	NA	NA
TCGA-DD-A1EJ-01A	1	TCGA-DD-A1EJ	1005	Chemotherapy	Sorafenib	No	NA	No	No	No
TCGA-DD-A1EK-01A	1	TCGA-DD-A1EK	558	Chemotherapy	Sorafenib	No	NA	Yes	No	No
TCGA-DD-A1EL-01A	1	TCGA-DD-A1EL	415	NA	NA	No	NA	Yes	No	No
TCGA-DD-A39V-01A	1	TCGA-DD-A39V	643	NA	NA	No	NA	No	No	Yes
TCGA-DD-A39W-01A	1	TCGA-DD-A39W	827	NA	NA	No	NA	NA	NA	NA
TCGA-DD-A39X-01A	1	TCGA-DD-A39X	1694	NA	NA	No	NA	Yes	No	No
TCGA-DD-A39Y-01A	1	TCGA-DD-A39Y	171	NA	NA	No	NA	No	No	No
TCGA-DD-A39Z-01A	1	TCGA-DD-A39Z	601	NA	NA	No	NA	NA	NA	NA
TCGA-DD-A3A1-01A	1	TCGA-DD-A3A1	233	NA	NA	No	NA	No	No	No
TCGA-DD-A3A2-01A	1	TCGA-DD-A3A2	2131	NA	NA	No	NA	No	No	No
TCGA-DD-A3A3-01A	1	TCGA-DD-A3A3	535	NA	NA	No	NA	NA	NA	NA
TCGA-DD-A3A4-01A	1	TCGA-DD-A3A4	612	Chemotherapy	Gemcitabine	No	NA	Yes	No	No
TCGA-DD-A3A5-01A	1	TCGA-DD-A3A5	3125	NA	NA	No	NA	No	No	No
TCGA-DD-A3A6-01A	1	TCGA-DD-A3A6	3258	NA	NA	No	NA	No	No	No
TCGA-DD-A3A7-01A	1	TCGA-DD-A3A7	419	Chemotherapy	NA	No	NA	No	No	No
TCGA-DD-A3A8-01A	1	TCGA-DD-A3A8	11	NA	NA	No	NA	No	No	No
TCGA-DD-A3A9-01A	1	TCGA-DD-A3A9	931	NA	NA	No	NA	NA	NA	NA
TCGA-DD-A4NA-01A	0	TCGA-DD-A4NA	1008	NA	NA	No	NA	No	No	No
TCGA-DD-A4NB-01A	0	TCGA-DD-A4NB	989	NA	NA	No	NA	No	No	No
TCGA-DD-A4ND-01A	0	TCGA-DD-A4ND	2746	Chemotherapy	Adriamycin/Cytoxan	No	NA	No	No	No
TCGA-DD-A4NE-01A	1	TCGA-DD-A4NE	660	Chemotherapy	Sorafenib	No	NA	No	No	No
TCGA-DD-A4NF-01A	0	TCGA-DD-A4NF	942	NA	NA	No	NA	No	No	No
TCGA-DD-A4NG-01A	1	TCGA-DD-A4NG	802	NA	NA	No	NA	No	No	No
TCGA-DD-A4NH-01A	0	TCGA-DD-A4NH	917	Chemotherapy	Sorafenib	No	NA	No	No	No
TCGA-DD-A4NI-01A	0	TCGA-DD-A4NI	816	NA	NA	No	NA	No	No	No
TCGA-DD-A4NJ-01A	0	TCGA-DD-A4NJ	928	NA	NA	No	NA	No	No	No
TCGA-DD-A4NK-01A	1	TCGA-DD-A4NK	1210	NA	NA	No	NA	Yes	No	No
TCGA-DD-A4NL-01A	0	TCGA-DD-A4NL	1711	NA	NA	No	NA	No	No	No
TCGA-DD-A4NN-01A	1	TCGA-DD-A4NN	899	NA	NA	No	NA	No	No	No
TCGA-DD-A4NO-01A	0	TCGA-DD-A4NO	2245	NA	NA	No	NA	No	No	No
TCGA-DD-A4NP-01A	0	TCGA-DD-A4NP	3308	NA	NA	No	NA	No	No	No
TCGA-DD-A4NQ-01A	1	TCGA-DD-A4NQ	373	Chemotherapy	Sorafenib	No	NA	No	No	No
TCGA-DD-A4NR-01A	1	TCGA-DD-A4NR	9	NA	NA	No	NA	No	No	No
TCGA-DD-A4NS-01A	1	TCGA-DD-A4NS	2456	Chemotherapy	Sorafenib	No	NA	No	No	No
TCGA-DD-A4NV-01A	0	TCGA-DD-A4NV	2398	NA	NA	No	NA	No	No	No
TCGA-DD-A73A-01A	0	TCGA-DD-A73A	728	NA	NA	No	NA	No	No	No
TCGA-DD-A73B-01A	1	TCGA-DD-A73B	283	NA	NA	No	NA	NA	NA	NA
TCGA-DD-A73C-01A	0	TCGA-DD-A73C	701	NA	NA	No	NA	No	No	No
TCGA-DD-A73D-01A	0	TCGA-DD-A73D	693	NA	NA	No	NA	No	No	No
TCGA-DD-A73E-01A	0	TCGA-DD-A73E	44	NA	NA	No	NA	No	No	No
TCGA-DD-A73F-01A	0	TCGA-DD-A73F	1085	NA	NA	No	NA	No	No	No
TCGA-DD-A73G-01A	0	TCGA-DD-A73G	3478	NA	NA	No	NA	No	No	No
TCGA-DD-AA3A-01A	1	TCGA-DD-AA3A	410	NA	NA	No	NA	NA	NA	NA
TCGA-DD-AAC8-01A	1	TCGA-DD-AAC8	16	NA	NA	No	NA	NA	NA	NA
TCGA-DD-AAC9-01A	0	TCGA-DD-AAC9	347	NA	NA	No	NA	NA	NA	NA
TCGA-DD-AACA-01A	0	TCGA-DD-AACA	2301	NA	NA	No	NA	No	No	No
TCGA-DD-AACB-01A	0	TCGA-DD-AACB	2324	NA	NA	No	NA	No	No	No
TCGA-DD-AACC-01A	1	TCGA-DD-AACC	1685	NA	NA	No	NA	NA	NA	NA
TCGA-DD-AACD-01A	1	TCGA-DD-AACD	381	NA	NA	No	NA	NA	NA	NA
TCGA-DD-AACE-01A	0	TCGA-DD-AACE	2184	NA	NA	No	NA	NA	No	No
TCGA-DD-AACF-01A	1	TCGA-DD-AACF	365	NA	NA	No	NA	NA	NA	NA
TCGA-DD-AACG-01A	1	TCGA-DD-AACG	469	NA	NA	No	NA	NA	NA	NA
TCGA-DD-AACH-01A	1	TCGA-DD-AACH	195	NA	NA	No	NA	NA	NA	NA
TCGA-DD-AACI-01A	0	TCGA-DD-AACI	1618	NA	NA	No	NA	No	No	No
TCGA-DD-AACJ-01A	0	TCGA-DD-AACJ	2102	NA	NA	No	NA	No	No	No
TCGA-DD-AACK-01A	0	TCGA-DD-AACK	9	NA	NA	No	NA	NA	NA	NA
TCGA-DD-AACL-01A	1	TCGA-DD-AACL	107	NA	NA	No	NA	No	No	No
TCGA-DD-AACN-01A	0	TCGA-DD-AACN	1302	NA	NA	No	NA	Yes	No	No
TCGA-DD-AACO-01A	0	TCGA-DD-AACO	1876	NA	NA	No	NA	No	No	No
TCGA-DD-AACP-01A	0	TCGA-DD-AACP	415	NA	NA	No	NA	No	No	No
TCGA-DD-AACQ-01A	1	TCGA-DD-AACQ	432	NA	NA	No	NA	No	No	No
TCGA-DD-AACS-01A	0	TCGA-DD-AACS	1804	NA	NA	No	NA	No	No	No
TCGA-DD-AACT-01A	0	TCGA-DD-AACT	1562	NA	NA	No	NA	No	No	No
TCGA-DD-AACU-01A	0	TCGA-DD-AACU	1567	NA	NA	No	NA	No	No	No
TCGA-DD-AACV-01A	0	TCGA-DD-AACV	1531	NA	NA	No	NA	Yes	No	No
TCGA-DD-AACW-01A	0	TCGA-DD-AACW	1424	NA	NA	No	NA	No	No	No
TCGA-DD-AACX-01A	0	TCGA-DD-AACX	170	NA	NA	No	NA	No	No	No
TCGA-DD-AACY-01A	0	TCGA-DD-AACY	1450	NA	NA	No	NA	Yes	No	No
TCGA-DD-AACZ-01A	1	TCGA-DD-AACZ	171	NA	NA	No	NA	NA	NA	NA
TCGA-DD-AAD0-01A	0	TCGA-DD-AAD0	137	NA	NA	No	NA	No	No	No
TCGA-DD-AAD1-01A	0	TCGA-DD-AAD1	564	NA	NA	No	NA	No	No	No
TCGA-DD-AAD2-01A	0	TCGA-DD-AAD2	658	NA	NA	No	NA	No	No	No
TCGA-DD-AAD3-01A	0	TCGA-DD-AAD3	1295	NA	NA	No	NA	No	No	No
TCGA-DD-AAD5-01A	0	TCGA-DD-AAD5	1345	NA	NA	No	NA	No	No	No
TCGA-DD-AAD6-01A	0	TCGA-DD-AAD6	672	NA	NA	No	NA	No	No	No
TCGA-DD-AAD8-01A	0	TCGA-DD-AAD8	1219	NA	NA	No	NA	No	No	No
TCGA-DD-AADA-01A	0	TCGA-DD-AADA	1233	NA	NA	No	NA	No	No	No
TCGA-DD-AADB-01A	0	TCGA-DD-AADB	1242	NA	NA	No	NA	No	No	No
TCGA-DD-AADC-01A	1	TCGA-DD-AADC	425	NA	NA	No	NA	NA	NA	NA
TCGA-DD-AADD-01A	0	TCGA-DD-AADD	1231	NA	NA	No	NA	No	No	No
TCGA-DD-AADF-01A	1	TCGA-DD-AADF	115	NA	NA	No	NA	NA	NA	NA
TCGA-DD-AADG-01A	0	TCGA-DD-AADG	1145	NA	NA	No	NA	No	No	No
TCGA-DD-AADI-01A	0	TCGA-DD-AADI	1085	NA	NA	No	NA	No	No	No
TCGA-DD-AADJ-01A	0	TCGA-DD-AADJ	1066	NA	NA	No	NA	No	No	No
TCGA-DD-AADK-01A	0	TCGA-DD-AADK	1049	NA	NA	No	NA	No	No	No
TCGA-DD-AADL-01A	0	TCGA-DD-AADL	636	NA	NA	No	NA	No	No	No
TCGA-DD-AADM-01A	1	TCGA-DD-AADM	12	NA	NA	No	NA	NA	NA	NA
TCGA-DD-AADN-01A	0	TCGA-DD-AADN	898	NA	NA	No	NA	No	No	No
TCGA-DD-AADO-01A	0	TCGA-DD-AADO	453	NA	NA	No	NA	No	No	No
TCGA-DD-AADP-01A	0	TCGA-DD-AADP	458	NA	NA	No	NA	No	No	No
TCGA-DD-AADQ-01A	0	TCGA-DD-AADQ	436	NA	NA	No	NA	No	No	No
TCGA-DD-AADR-01A	0	TCGA-DD-AADR	2028	NA	NA	No	NA	No	No	No
TCGA-DD-AADS-01A	0	TCGA-DD-AADS	474	NA	NA	No	NA	No	No	No
TCGA-DD-AADU-01A	0	TCGA-DD-AADU	554	NA	NA	No	NA	No	No	No
TCGA-DD-AADV-01A	0	TCGA-DD-AADV	574	NA	NA	No	NA	No	No	No
TCGA-DD-AADW-01A	0	TCGA-DD-AADW	587	NA	NA	No	NA	No	No	No
TCGA-DD-AADY-01A	0	TCGA-DD-AADY	555	NA	NA	No	NA	No	No	No
TCGA-DD-AAE0-01A	0	TCGA-DD-AAE0	555	NA	NA	No	NA	No	No	No
TCGA-DD-AAE1-01A	0	TCGA-DD-AAE1	552	NA	NA	No	NA	No	No	No
TCGA-DD-AAE2-01A	0	TCGA-DD-AAE2	638	NA	NA	No	NA	No	No	No
TCGA-DD-AAE3-01A	0	TCGA-DD-AAE3	566	NA	NA	No	NA	No	No	No
TCGA-DD-AAE4-01A	0	TCGA-DD-AAE4	608	NA	NA	No	NA	No	No	No
TCGA-DD-AAE6-01A	0	TCGA-DD-AAE6	141	NA	NA	No	NA	No	No	No
TCGA-DD-AAE7-01A	0	TCGA-DD-AAE7	644	NA	NA	No	NA	No	No	No
TCGA-DD-AAE9-01A	0	TCGA-DD-AAE9	722	NA	NA	No	NA	No	No	No
TCGA-DD-AAEA-01A	0	TCGA-DD-AAEA	575	NA	NA	No	NA	No	No	No
TCGA-DD-AAEB-01A	0	TCGA-DD-AAEB	478	NA	NA	No	NA	No	No	No
TCGA-DD-AAED-01A	0	TCGA-DD-AAED	763	NA	NA	No	NA	No	No	No
TCGA-DD-AAEE-01A	0	TCGA-DD-AAEE	810	NA	NA	No	NA	No	No	No
TCGA-DD-AAEG-01A	0	TCGA-DD-AAEG	719	NA	NA	No	NA	No	No	No
TCGA-DD-AAEH-01A	0	TCGA-DD-AAEH	784	NA	NA	No	NA	No	No	No
TCGA-DD-AAEI-01A	0	TCGA-DD-AAEI	1531	NA	NA	No	NA	Yes	No	No
TCGA-DD-AAEK-01A	0	TCGA-DD-AAEK	1067	NA	NA	No	NA	No	No	No
TCGA-DD-AAVP-01A	0	TCGA-DD-AAVP	2752	NA	NA	No	NA	Yes	No	No
TCGA-DD-AAVQ-01A	0	TCGA-DD-AAVQ	2728	NA	NA	No	NA	Yes	No	No
TCGA-DD-AAVR-01A	0	TCGA-DD-AAVR	2513	NA	NA	No	NA	No	No	No
TCGA-DD-AAVS-01A	0	TCGA-DD-AAVS	1823	NA	NA	No	NA	No	No	No
TCGA-DD-AAVU-01A	0	TCGA-DD-AAVU	2202	NA	NA	No	NA	No	No	No
TCGA-DD-AAVV-01A	0	TCGA-DD-AAVV	2455	NA	NA	No	NA	No	No	No
TCGA-DD-AAVW-01A	0	TCGA-DD-AAVW	2317	NA	NA	No	NA	No	No	No
TCGA-DD-AAVX-01A	0	TCGA-DD-AAVX	1718	NA	NA	No	NA	Yes	Yes	Yes
TCGA-DD-AAVY-01A	0	TCGA-DD-AAVY	1970	NA	NA	No	NA	No	No	No
TCGA-DD-AAVZ-01A	0	TCGA-DD-AAVZ	1900	NA	NA	No	NA	No	No	No
TCGA-DD-AAW0-01A	0	TCGA-DD-AAW0	2015	NA	NA	No	NA	No	No	No
TCGA-DD-AAW1-01A	0	TCGA-DD-AAW1	1989	NA	NA	No	NA	No	No	No
TCGA-DD-AAW2-01A	0	TCGA-DD-AAW2	1855	NA	NA	No	NA	NA	Yes	NA
TCGA-DD-AAW3-01A	0	TCGA-DD-AAW3	1633	NA	NA	No	NA	No	No	No
TCGA-ED-A459-01A	0	TCGA-ED-A459	910	Ancillary	Alvesin	No	NA	No	Yes	Yes
TCGA-ED-A4XI-01A	0	TCGA-ED-A4XI	819	NA	NA	No	NA	No	NA	No
TCGA-ED-A5KG-01A	0	TCGA-ED-A5KG	854	NA	NA	No	NA	No	No	No
TCGA-ED-A627-01A	0	TCGA-ED-A627	423	NA	NA	No	NA	No	No	No
TCGA-ED-A66X-01A	0	TCGA-ED-A66X	406	NA	NA	No	NA	NA	No	NA
TCGA-ED-A66Y-01A	1	TCGA-ED-A66Y	296	NA	NA	No	NA	No	No	No
TCGA-ED-A7PX-01A	0	TCGA-ED-A7PX	6	NA	NA	No	NA	NA	NA	NA
TCGA-ED-A7PY-01A	0	TCGA-ED-A7PY	390	NA	NA	No	NA	Yes	No	No
TCGA-ED-A7PZ-01A	0	TCGA-ED-A7PZ	6	NA	NA	No	NA	NA	NA	NA
TCGA-ED-A7XO-01A	0	TCGA-ED-A7XO	427	NA	NA	No	NA	No	NA	No
TCGA-ED-A7XP-01A	0	TCGA-ED-A7XP	400	NA	NA	No	NA	NA	NA	No
TCGA-ED-A82E-01A	0	TCGA-ED-A82E	408	NA	NA	No	NA	No	No	No
TCGA-ED-A8O5-01A	0	TCGA-ED-A8O5	406	NA	NA	No	NA	No	No	No
TCGA-ED-A8O6-01A	1	TCGA-ED-A8O6	56	NA	NA	No	NA	No	No	No
TCGA-ED-A97K-01A	0	TCGA-ED-A97K	6	NA	NA	No	NA	NA	NA	NA
TCGA-EP-A12J-01A	0	TCGA-EP-A12J	570	NA	NA	No	NA	No	No	No
TCGA-EP-A26S-01A	0	TCGA-EP-A26S	608	NA	NA	No	NA	No	No	No
TCGA-EP-A2KA-01A	1	TCGA-EP-A2KA	627	Targeted molecular therapy	Sorafenib	No	NA	No	No	No
TCGA-EP-A2KB-01A	1	TCGA-EP-A2KB	596	NA	NA	No	Right hepatectomy (segment 6)	No	No	No
TCGA-EP-A2KC-01A	1	TCGA-EP-A2KC	19	NA	NA	No	NA	No	No	No
TCGA-EP-A3JL-01A	0	TCGA-EP-A3JL	303	NA	NA	No	Laparoscopic partial hepatectomy in segment 4B and 5, laproscopic cholecystectomy, ultrasound guided radiofrequency ablation of 4cm for a 2.2cm lesion between the left portal vein and middle hepatic vein	No	No	No
TCGA-EP-A3RK-01A	0	TCGA-EP-A3RK	363	NA	NA	No	Left hepatic lobectomy	No	No	No
TCGA-ES-A2HS-01A	1	TCGA-ES-A2HS	688	NA	NA	No	NA	NA	NA	NA
TCGA-ES-A2HT-01A	1	TCGA-ES-A2HT	438	NA	NA	No	NA	NA	NA	NA
TCGA-FV-A23B-01A	1	TCGA-FV-A23B	1852	NA	NA	No	Surgical resection	No	No	No
TCGA-FV-A2QQ-01A	0	TCGA-FV-A2QQ	729	NA	NA	No	NA	No	No	No
TCGA-FV-A2QR-01A	1	TCGA-FV-A2QR	581	NA	NA	No	NA	No	No	No
TCGA-FV-A3I0-01A	0	TCGA-FV-A3I0	848	Chemotherapy	Gemcitabine	No	NA	No	No	No
TCGA-FV-A3I1-01A	1	TCGA-FV-A3I1	247	NA	NA	No	NA	No	No	No
TCGA-FV-A3R2-01A	1	TCGA-FV-A3R2	194	Chemotherapy	Cisplatin	No	NA	No	Yes	No
TCGA-FV-A3R3-01A	1	TCGA-FV-A3R3	366	NA	NA	No	Partial hepatectomy	No	No	No
TCGA-FV-A495-01A	0	TCGA-FV-A495	1	NA	NA	No	NA	NA	NA	NA
TCGA-FV-A496-01A	0	TCGA-FV-A496	10	NA	NA	No	NA	NA	NA	NA
TCGA-FV-A4ZP-01A	1	TCGA-FV-A4ZP	2486	NA	NA	No	NA	No	No	No
TCGA-FV-A4ZQ-01A	0	TCGA-FV-A4ZQ	12	NA	NA	No	NA	NA	NA	NA
TCGA-G3-A25S-01A	1	TCGA-G3-A25S	416	Chemotherapy	Sunitinib	No	NA	No	No	No
TCGA-G3-A25T-01A	0	TCGA-G3-A25T	1553	NA	NA	No	NA	No	No	No
TCGA-G3-A25U-01A	0	TCGA-G3-A25U	1636	NA	NA	No	NA	No	No	No
TCGA-G3-A25V-01A	0	TCGA-G3-A25V	860	NA	NA	No	NA	No	No	No
TCGA-G3-A25X-01A	0	TCGA-G3-A25X	1779	NA	NA	No	NA	No	No	No
TCGA-G3-A25Y-01A	1	TCGA-G3-A25Y	452	NA	NA	No	NA	No	No	No
TCGA-G3-A25Z-01A	0	TCGA-G3-A25Z	655	NA	NA	No	NA	No	No	No
TCGA-G3-A3CG-01A	0	TCGA-G3-A3CG	673	Targeted molecular therapy	Sorafenib	Yes	NA	No	No	No
TCGA-G3-A3CH-01A	0	TCGA-G3-A3CH	780	Chemotherapy	Sorafenib	No	NA	No	No	No
TCGA-G3-A3CI-01A	0	TCGA-G3-A3CI	180	NA	NA	No	NA	NA	NA	NA
TCGA-G3-A3CJ-01A	0	TCGA-G3-A3CJ	594	Targeted molecular therapy	Sorafenib	No	NA	No	No	No
TCGA-G3-A3CK-01A	0	TCGA-G3-A3CK	585	NA	NA	No	NA	No	No	No
TCGA-G3-A5SI-01A	1	TCGA-G3-A5SI	768	Chemotherapy	Sorafenib	No	NA	No	No	No
TCGA-G3-A5SJ-01A	0	TCGA-G3-A5SJ	698	NA	NA	No	NA	No	No	No
TCGA-G3-A5SK-01A	0	TCGA-G3-A5SK	744	NA	NA	No	NA	Yes	No	No
TCGA-G3-A5SL-01A	0	TCGA-G3-A5SL	621	NA	NA	No	Right hepatectomy cholecystectomy	No	No	No
TCGA-G3-A5SM-01A	0	TCGA-G3-A5SM	520	NA	NA	No	Partial left hepatectomy	Yes	No	No
TCGA-G3-A6UC-01A	0	TCGA-G3-A6UC	671	NA	NA	No	NA	No	No	No
TCGA-G3-A7M5-01A	0	TCGA-G3-A7M5	447	NA	NA	No	NA	No	No	No
TCGA-G3-A7M6-01A	0	TCGA-G3-A7M6	632	NA	NA	No	NA	No	No	No
TCGA-G3-A7M7-01A	0	TCGA-G3-A7M7	361	NA	NA	No	NA	No	No	No
TCGA-G3-A7M8-01A	0	TCGA-G3-A7M8	430	NA	NA	No	NA	No	No	No
TCGA-G3-A7M9-01A	1	TCGA-G3-A7M9	56	NA	NA	No	NA	No	No	No
TCGA-G3-AAUZ-01A	0	TCGA-G3-AAUZ	480	NA	NA	No	NA	No	No	No
TCGA-G3-AAV0-01A	0	TCGA-G3-AAV0	476	NA	NA	No	NA	No	No	No
TCGA-G3-AAV1-01A	1	TCGA-G3-AAV1	359	NA	NA	No	NA	No	No	No
TCGA-G3-AAV2-01A	0	TCGA-G3-AAV2	372	NA	NA	No	NA	No	No	No
TCGA-G3-AAV3-01A	0	TCGA-G3-AAV3	412	NA	NA	No	NA	No	No	No
TCGA-G3-AAV4-01A	1	TCGA-G3-AAV4	27	NA	NA	No	NA	No	No	No
TCGA-G3-AAV5-01A	0	TCGA-G3-AAV5	354	Chemotherapy	HEC.1 - Sorafenib vs Sorafenib plus doxorubicin	No	NA	Yes	Yes	NA
TCGA-G3-AAV6-01A	1	TCGA-G3-AAV6	65	NA	NA	No	NA	No	No	No
TCGA-G3-AAV7-01A	0	TCGA-G3-AAV7	361	NA	NA	No	NA	No	No	No
TCGA-GJ-A3OU-01A	0	TCGA-GJ-A3OU	879	NA	NA	No	NA	No	No	No
TCGA-GJ-A6C0-01A	1	TCGA-GJ-A6C0	31	NA	NA	No	Partial hepatectomy	NA	NA	NA
TCGA-GJ-A9DB-01A	1	TCGA-GJ-A9DB	67	NA	NA	No	Right hepatectomy	NA	NA	NA
TCGA-HP-A5MZ-01A	1	TCGA-HP-A5MZ	91	NA	NA	No	NA	No	No	No
TCGA-HP-A5N0-01A	1	TCGA-HP-A5N0	752	NA	NA	No	NA	No	No	No
TCGA-K7-A5RF-01A	0	TCGA-K7-A5RF	631	NA	NA	No	NA	Yes	No	No
TCGA-K7-A5RG-01A	0	TCGA-K7-A5RG	519	NA	NA	No	NA	No	No	No
TCGA-K7-A6G5-01A	0	TCGA-K7-A6G5	512	NA	NA	No	NA	No	No	No
TCGA-K7-AAU7-01A	0	TCGA-K7-AAU7	359	NA	Gemcitabine	No	NA	No	Yes	No
TCGA-KR-A7K0-01A	1	TCGA-KR-A7K0	65	NA	NA	No	NA	NA	NA	NA
TCGA-KR-A7K2-01A	0	TCGA-KR-A7K2	829	NA	NA	No	Open liver resection	No	No	No
TCGA-KR-A7K7-01A	0	TCGA-KR-A7K7	951	NA	NA	No	NA	No	No	No
TCGA-KR-A7K8-01A	0	TCGA-KR-A7K8	906	NA	NA	No	NA	No	No	No
TCGA-LG-A6GG-01A	0	TCGA-LG-A6GG	387	NA	NA	No	NA	No	No	No
TCGA-LG-A9QC-01A	0	TCGA-LG-A9QC	425	NA	NA	No	NA	No	No	No
TCGA-LG-A9QD-01A	0	TCGA-LG-A9QD	366	Chemotherapy	Sorafinib ( nexavar)	No	NA	No	Yes	No
TCGA-MI-A75C-01A	0	TCGA-MI-A75C	291	NA	NA	No	NA	No	No	No
TCGA-MI-A75E-01A	0	TCGA-MI-A75E	507	NA	NA	No	NA	No	No	No
TCGA-MI-A75G-01A	0	TCGA-MI-A75G	698	NA	NA	No	NA	No	No	No
TCGA-MI-A75H-01A	0	TCGA-MI-A75H	747	NA	NA	No	NA	Yes	No	No
TCGA-MI-A75I-01A	0	TCGA-MI-A75I	630	NA	NA	No	NA	No	No	No
TCGA-MR-A520-01A	0	TCGA-MR-A520	229	NA	NA	No	NA	No	No	No
TCGA-MR-A8JO-01A	0	TCGA-MR-A8JO	330	NA	NA	No	NA	No	No	No
TCGA-NI-A4U2-01A	1	TCGA-NI-A4U2	1791	NA	NA	No	NA	NA	NA	NA
TCGA-NI-A8LF-01A	0	TCGA-NI-A8LF	799	NA	NA	No	Laproscopic left partial hepectomy segments 2 & 3	No	No	No
TCGA-O8-A75V-01A	0	TCGA-O8-A75V	538	NA	NA	No	Wedge resection	No	No	No
TCGA-PD-A5DF-01A	1	TCGA-PD-A5DF	639	NA	NA	No	NA	NA	NA	NA
TCGA-QA-A7B7-01A	0	TCGA-QA-A7B7	94	NA	NA	No	Liver and diaphragm, right lobe, partial hepatectomy	No	No	No
TCGA-RC-A6M4-01A	0	TCGA-RC-A6M4	22	NA	NA	No	NA	NA	NA	NA
TCGA-RC-A6M5-01A	0	TCGA-RC-A6M5	15	NA	NA	No	NA	NA	NA	NA
TCGA-RC-A6M6-01A	0	TCGA-RC-A6M6	9	NA	NA	No	NA	NA	NA	NA
TCGA-RC-A7S9-01A	0	TCGA-RC-A7S9	640	NA	NA	No	NA	NA	NA	NA
TCGA-RC-A7SB-01A	0	TCGA-RC-A7SB	588	NA	NA	No	NA	NA	NA	NA
TCGA-RC-A7SF-01A	0	TCGA-RC-A7SF	579	NA	NA	No	NA	NA	NA	NA
TCGA-RC-A7SH-01A	0	TCGA-RC-A7SH	468	NA	NA	No	NA	NA	NA	NA
TCGA-RC-A7SK-01A	0	TCGA-RC-A7SK	472	NA	NA	No	NA	NA	NA	NA
TCGA-RG-A7D4-01A	0	TCGA-RG-A7D4	1098	NA	NA	No	NA	No	No	No
TCGA-T1-A6J8-01A	0	TCGA-T1-A6J8	23	NA	NA	No	NA	NA	NA	NA
TCGA-UB-A7MA-01A	0	TCGA-UB-A7MA	848	Chemotherapy	Gemcitabine	No	NA	No	No	No
TCGA-UB-A7MB-01A	0	TCGA-UB-A7MB	601	Targeted molecular therapy	Sorafenib	No	NA	No	No	No
TCGA-UB-A7MC-01A	0	TCGA-UB-A7MC	500	NA	NA	No	NA	No	No	No
TCGA-UB-A7MD-01A	1	TCGA-UB-A7MD	52	NA	NA	No	NA	No	No	No
TCGA-UB-A7ME-01A	0	TCGA-UB-A7ME	486	NA	NA	No	NA	No	No	No
TCGA-UB-A7MF-01A	1	TCGA-UB-A7MF	214	NA	NA	No	NA	NA	NA	NA
TCGA-UB-AA0U-01A	0	TCGA-UB-AA0U	327	NA	NA	No	NA	No	No	No
TCGA-UB-AA0V-01A	0	TCGA-UB-AA0V	314	NA	NA	No	NA	No	No	No
TCGA-WJ-A86L-01A	0	TCGA-WJ-A86L	345	NA	NA	No	NA	No	No	No
TCGA-WQ-A9G7-01A	0	TCGA-WQ-A9G7	30	NA	NA	No	Partial hepatectomy	No	No	No
TCGA-WQ-AB4B-01A	0	TCGA-WQ-AB4B	395	NA	NA	No	NA	No	No	No
TCGA-WX-AA44-01A	0	TCGA-WX-AA44	615	Targeted molecular therapy	Sorafenib	No	Left lateral hepatectomy	Yes	Yes	Yes
TCGA-WX-AA46-01A	0	TCGA-WX-AA46	756	NA	NA	No	Right posterior hepatectomy	No	No	No
TCGA-WX-AA47-01A	1	TCGA-WX-AA47	556	Chemotherapy	Sorafenib	No	NA	NA	NA	NA
TCGA-XR-A8TC-01A	0	TCGA-XR-A8TC	1339	NA	NA	Yes	NA	Yes	No	No
TCGA-XR-A8TD-01A	0	TCGA-XR-A8TD	1030	NA	NA	No	NA	No	No	No
TCGA-XR-A8TE-01A	0	TCGA-XR-A8TE	925	NA	NA	No	NA	No	Yes	No
TCGA-XR-A8TF-01A	1	TCGA-XR-A8TF	693	NA	NA	No	NA	No	No	No
TCGA-XR-A8TG-01A	0	TCGA-XR-A8TG	898	NA	NA	No	NA	Yes	No	Yes
TCGA-YA-A8S7-01A	1	TCGA-YA-A8S7	412	NA	NA	No	Right hepatectomy	NA	NA	NA
TCGA-ZP-A9CV-01A	1	TCGA-ZP-A9CV	1088	NA	NA	No	NA	No	No	No
TCGA-ZP-A9CY-01A	0	TCGA-ZP-A9CY	782	NA	NA	No	NA	No	No	No
TCGA-ZP-A9CZ-01A	0	TCGA-ZP-A9CZ	706	NA	NA	No	NA	No	No	No
TCGA-ZP-A9D0-01A	0	TCGA-ZP-A9D0	1091	NA	NA	No	NA	No	No	No
TCGA-ZP-A9D1-01A	0	TCGA-ZP-A9D1	21	NA	NA	No	NA	No	No	No
TCGA-ZP-A9D2-01A	1	TCGA-ZP-A9D2	765	NA	NA	No	NA	No	No	No
TCGA-ZP-A9D4-01A	0	TCGA-ZP-A9D4	395	NA	NA	No	NA	No	No	No
TCGA-ZS-A9CD-01A	1	TCGA-ZS-A9CD	1386	NA	NA	No	NA	NA	NA	NA
TCGA-ZS-A9CE-01A	0	TCGA-ZS-A9CE	1241	NA	NA	No	NA	No	No	No
TCGA-ZS-A9CF-01A	0	TCGA-ZS-A9CF	2412	NA	NA	No	NA	No	No	No
TCGA-ZS-A9CG-01A	0	TCGA-ZS-A9CG	341	NA	NA	No	NA	No	No	No
For overall survival, 1 indicates an event of death and 0 indicates alive and censored beyond the observed timepoint of the analysis, which represents patients who are still alive or were not dead at the time of the analysis. NA, not applicable; rx, prescription; tx, treatment; TCGA, The Cancer Genome Atlas.
